# Supplementary material for: Automated assessment of CD8+ T-lymphocytes and stroma fractions complement conventional staging of colorectal cancer
Source: PubMed Central journal article supplement (PMC8411014; doi:10.1016/j.ebiom.2021.103547), 2021-08-31
Supplement: mmc1.pdf [file mmc1.pdf]

**Supplementary Table 1**

**Univariate analyses of 5-year overall survival (OS) according to clinicopathological features in the validation set (n=1041).**

| Variable                      | Stage II and low-risk stage III |            |                   |         | High-risk stage III |            |                  |         |
|-------------------------------|---------------------------------|------------|-------------------|---------|---------------------|------------|------------------|---------|
|                               | Total number                    | n (%)      | HR (95% CI)       | P-value | Total number        | n (%)      | HR (95% CI)      | P-value |
| Age                           | 598                             | 598 (100%) | 1.03 (1.00-1.06)  | 0.034   | 394                 | 394 (100%) | 1.01 (0.99-1.02) | 0.52    |
| Gender                        | 598                             |            |                   | 0.19    | 394                 |            |                  | 0.72    |
| Male                          |                                 | 342 (57%)  | Ref.              |         |                     | 234 (59%)  | Ref.             |         |
| Female                        |                                 | 256 (43%)  | 0.71 (0.43-1.19)  |         |                     | 160 (41%)  | 1.07 (0.76-1.50) |         |
| Randomised adjuvant treatment | 598                             |            |                   | 0.36    | 394                 |            |                  | 0.12    |
| CAP                           |                                 | 295 (49%)  | Ref.              |         |                     | 197 (50%)  | Ref.             |         |
| CAP+BEV                       |                                 | 303 (51%)  | 1.26 (0.77-2.05)  |         |                     | 197 (50%)  | 1.31 (0.93-1.84) |         |
| Sidedness                     | 578                             |            |                   | 0.90    | 387                 |            |                  | 0.001   |
| Right                         |                                 | 321 (56%)  | Ref.              |         |                     | 226 (58%)  | Ref.             |         |
| Left                          |                                 | 257 (44%)  | 0.97 (0.58-1.60)  |         |                     | 161 (42%)  | 1.75 (1.24-2.47) |         |
| Number of lymph nodes removed | 583                             |            |                   | 0.013   | 393                 |            |                  | 0.60    |
| ≥12                           |                                 | 453 (78%)  | Ref.              |         |                     | 307 (78%)  | Ref.             |         |
| <12                           |                                 | 130 (22%)  | 1.92 (1.14-3.23)  |         |                     | 86 (22%)   | 0.89 (0.59-1.35) |         |
| Histological grade            | 572                             |            |                   | 0.48    | 383                 |            |                  | 0.17    |
| Well                          |                                 | 25 (4%)    | Ref.              |         |                     | 13 (3%)    | Ref.             |         |
| Moderate                      |                                 | 461 (81%)  | 2.55 (0.35-18.49) |         |                     | 302 (79%)  | 1.09 (0.40-2.97) |         |
| Poor                          |                                 | 86 (15%)   | 3.18 (0.41-24.62) |         |                     | 68 (18%)   | 1.62 (0.57-4.63) |         |
| KRAS                          | 555                             |            |                   | 0.56    | 358                 |            |                  | 0.41    |
| Wild type                     |                                 | 374 (67%)  | Ref.              |         |                     | 240 (67%)  | Ref.             |         |
| Mutated                       |                                 | 181 (33%)  | 1.17 (0.69-1.97)  |         |                     | 118 (33%)  | 1.17 (0.81-1.69) |         |
| BRAF                          | 544                             |            |                   | 0.031   | 371                 |            |                  | 0.093   |
| Wild type                     |                                 | 478 (88%)  | Ref.              |         |                     | 315 (85%)  | Ref.             |         |

|                                                   |     |           |                  |      |     |           |                  |        |
|---------------------------------------------------|-----|-----------|------------------|------|-----|-----------|------------------|--------|
| Mutated                                           |     | 66 (12%)  | 1.98 (1.05-3.74) |      |     | 56 (15%)  | 1.47 (0.93-2.32) |        |
| Microsatellite instability                        | 569 |           |                  | 0.50 | 381 |           |                  | 0.74   |
| MSI-H                                             |     | 77 (14%)  | Ref.             |      |     | 42 (11%)  | Ref.             |        |
| MSS                                               |     | 492 (86%) | 0.79 (0.40-1.56) |      |     | 339 (89%) | 1.11 (0.61-2.01) |        |
| CD8 <sup>+</sup> T-lymphocyte and stroma fraction | 598 |           |                  | 0.43 | 394 |           |                  | <0.001 |
| High CD8 fraction and low stroma fraction         |     | 282 (47%) | Ref.             |      |     | 138 (35%) | Ref.             |        |
| Low CD8 fraction or high stroma fraction          |     | 278 (46%) | 1.39 (0.83-2.32) |      |     | 222 (56%) | 1.58 (1.05-2.36) |        |
| Low CD8 fraction and high stroma fraction         |     | 38 (6%)   | 1.41 (0.54-3.70) |      |     | 34 (9%)   | 2.89 (1.68-4.99) |        |
| CD8 <sup>+</sup> T-lymphocyte fraction            | 598 |           |                  | 0.70 | 394 |           |                  | 0.018  |
| High (>2.7%)                                      |     | 331 (55%) | Ref.             |      |     | 174 (44%) | Ref.             |        |
| Low (<=2.7%)                                      |     | 267 (45%) | 1.10 (0.68-1.79) |      |     | 220 (56%) | 1.53 (1.07-2.18) |        |
| Stroma fraction                                   | 598 |           |                  | 0.12 | 394 |           |                  | 0.004  |
| Low (<56%)                                        |     | 511 (85%) | Ref.             |      |     | 324 (82%) | Ref.             |        |
| High (>=56%)                                      |     | 87 (15%)  | 1.59 (0.88-2.88) |      |     | 70 (18%)  | 1.75 (1.19-2.58) |        |

---

Definition: low-risk stage III, pathological tumour stage (pT) 3 pathological lymph node stage (pN) 1 with neither lymphatic nor vascular invasion; high-risk stage III, stage III pT3 N1 with lymphatic and/or vascular invasion, pT4, or pN2. Abbreviation: HR, hazard risk; CI, confidence interval; Ref, reference; CAP, capecitabine; BEV, bevacizumab; MSI-H, microsatellite instability-high; MSS, microsatellite stable.
